# Supplementary material for: Systematic characterization of metabolic profiles of ingenol in rats by UPLC-Q/TOF-MS and NMR in combination with microbial biotransformation
Source: Royal Society of Chemistry journal article supplement (doi:10.1039/d1ra07915h), 2021-01-01
Supplement: d1ra07915h1.pdf [file d1ra07915h1.pdf]

## Supporting Information

### Systematic characterization of metabolic profiles of Ingenol in rat by UPLC-Q/TOF-MS

Si-Jia Xiao<sup>a, 1</sup>, Shan-Shan Li, <sup>‡b</sup> Bin Xie,<sup>a</sup> Wei-Chen<sup>a, 1</sup>, Xi-Ke Xu<sup>a</sup>, Xian-Peng Zu<sup>a\*</sup>, Yun-Heng Shen<sup>a\*</sup>

<sup>a</sup> Department of Natural Medicinal Chemistry, School of Pharmacy, Naval Medical University, Shanghai 200433, China

<sup>1</sup> These authors contributed equally to this work.

#### \* Correspondence

Address: Department of Natural Medicinal Chemistry, School of Pharmacy, Naval Medical University, No. 325 Guohe Road, Yangpu District, Shanghai 200433, China.

Corresponding Authors: Dr. Xian-Peng Zu, E-mail: zuxianpeng@163.com; Dr. Yun-Heng Shen, E-mail: shenyunheng@hotmail.com

## Contents

- Figure S1. Key  $^1\text{H}$ - $^1\text{H}$  COSY (—), HMBC (→) and ROESY (↔) correlations of **M3**
- Figure S2. Key  $^1\text{H}$ - $^1\text{H}$  COSY (—), HMBC (→) and ROESY (↔) correlations of **M4**
- Figure S3. HRESIMS spectrum of 16 $\alpha$ -hydroxy ingenol (**M2**)
- Figure S4.  $^1\text{H}$ -NMR spectrum of 16 $\alpha$ -hydroxy ingenol (**M2**) in methanol- $d_4$
- Figure S5.  $^{13}\text{C}$  and DEPT-135 NMR spectrum of 16 $\alpha$ -hydroxy ingenol (**M2**) in methanol- $d_4$
- Figure S6. HRESIMS spectrum of 17 $\beta$ -hydroxy ingenol (**M3**)
- Figure S7. OR Value of 17 $\beta$ -hydroxy ingenol (**M3**) in  $\text{CH}_3\text{OH}$
- Figure S8. CD Value of 17 $\beta$ -hydroxy ingenol (**M3**) in  $\text{CH}_3\text{OH}$
- Figure S9. UV spectrum of 17 $\beta$ -hydroxy ingenol (**M3**) in  $\text{CH}_3\text{OH}$
- Figure S10.  $^1\text{H}$ -NMR spectrum of 17 $\beta$ -hydroxy ingenol (**M3**) in methanol- $d_4$
- Figure S11.  $^{13}\text{C}$  and DEPT-135 NMR spectrum of 17 $\beta$ -hydroxy ingenol (**M3**) in methanol- $d_4$
- Figure S12.  $^1\text{H}$ - $^1\text{H}$  COSY spectrum of 17 $\beta$ -hydroxy ingenol (**M3**) in methanol- $d_4$
- Figure S13. HSQC spectrum of 17 $\beta$ -hydroxy ingenol (**M3**) in methanol- $d_4$
- Figure S14. HMBC spectrum of 17 $\beta$ -hydroxy ingenol (**M3**) in methanol- $d_4$
- Figure S15. NOESY spectrum of 17 $\beta$ -hydroxy ingenol (**M3**) in methanol- $d_4$
- Figure S16. HRESIMS spectrum of 19-hydroxy ingenol (**M4**)
- Figure S17. OR Value of 19-hydroxy ingenol (**M4**) in  $\text{CH}_3\text{OH}$
- Figure S18. CD Value of 19-hydroxy ingenol (**M4**) in  $\text{CH}_3\text{OH}$
- Figure S19. UV spectrum of 19-hydroxy ingenol (**M4**) in  $\text{CH}_3\text{OH}$
- Figure S20.  $^1\text{H}$ -NMR spectrum of 19-hydroxy ingenol (**M4**) in methanol- $d_4$
- Figure S21.  $^{13}\text{C}$ -NMR and DEPT-135 spectrum of 19-hydroxy ingenol (**M4**) in methanol- $d_4$
- Figure S22.  $^1\text{H}$ - $^1\text{H}$  COSY spectrum of 19-hydroxy ingenol (**M4**) in methanol- $d_4$
- Figure S23. HSQC spectrum of 19-hydroxy ingenol (**M4**) in methanol- $d_4$
- Figure S24. HMBC spectrum of 19-hydroxy ingenol (**M4**) in methanol- $d_4$
- Figure S25. NOESY spectrum of 19-hydroxy ingenol (**M4**) in methanol- $d_4$

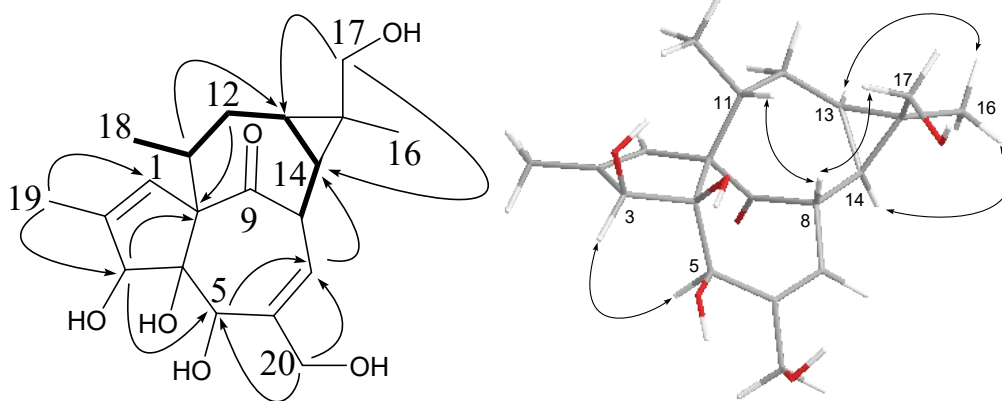

Figure S1. Key  $^1\text{H}$ - $^1\text{H}$  COSY (—), HMBC (---) and ROESY (····) correlations of **M3**

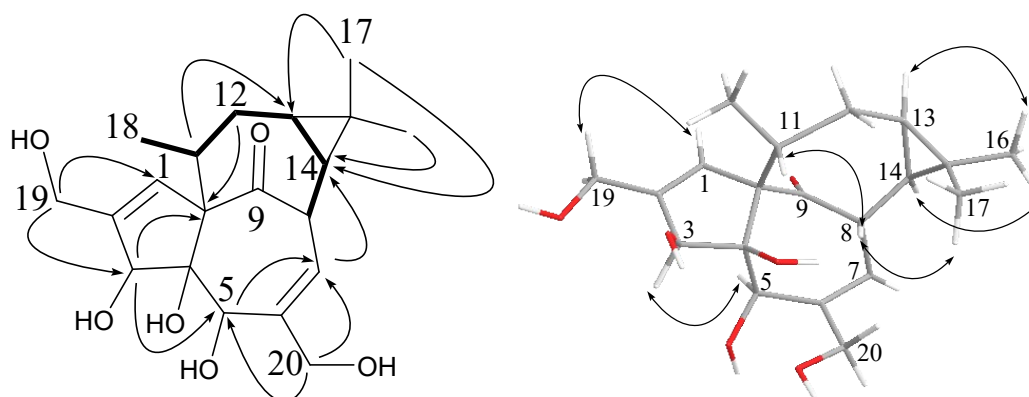

Figure S2. Key  $^1\text{H}$ - $^1\text{H}$  COSY (—), HMBC (---) and ROESY (····) correlations of **M4**

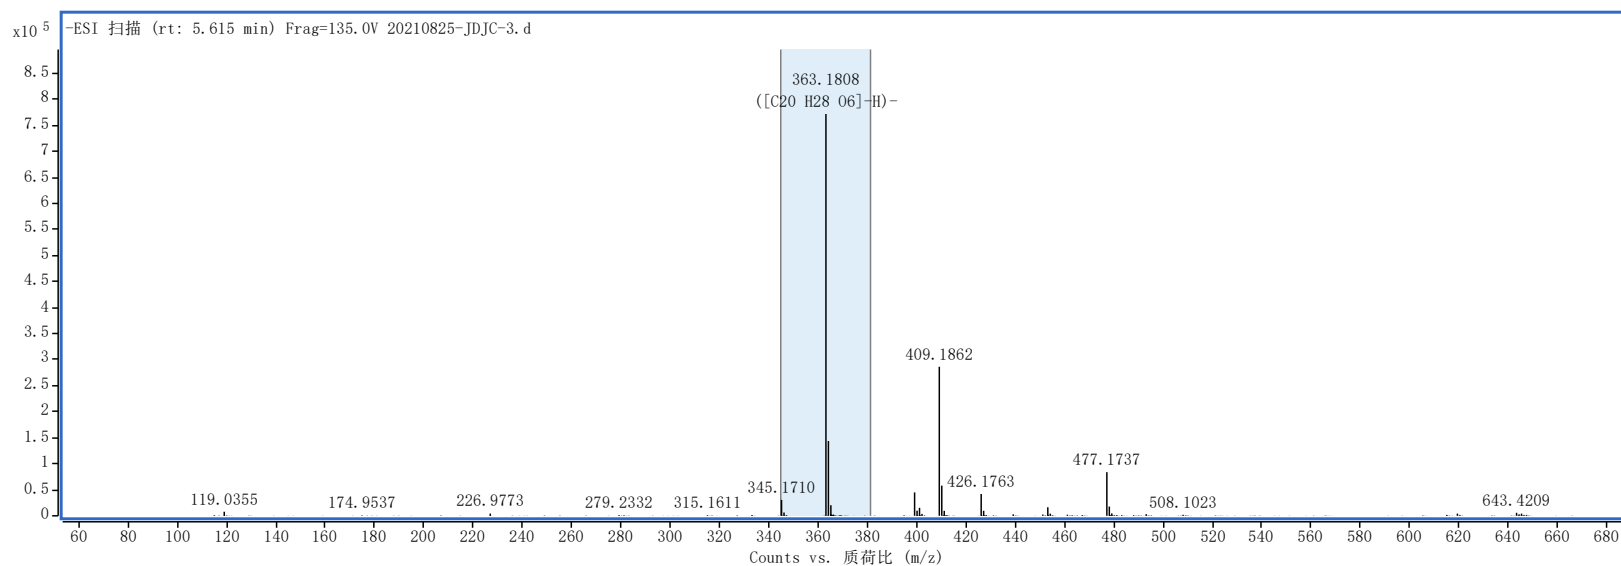

| Height (Calc) | Height Sum% (Calc) | Height % (Calc) | m/z (Calc) | Diff (mDa) | Height   | Height % | Height Sum % | m/z      |
|---------------|--------------------|-----------------|------------|------------|----------|----------|--------------|----------|
| 743524        | 79.3               | 100             | 363.1813   | 0.5        | 771702.1 | 100      | 82.3         | 363.1808 |

| Species | m/z      | Score (iso. abund) | Score (mass) | Score (MS) | Score (MFG) | Score (iso. spacing) | Height   | Ion Formula |
|---------|----------|--------------------|--------------|------------|-------------|----------------------|----------|-------------|
| (M-H)-  | 363.1808 | 90.64              | 98.6         | 96.65      | 96.65       | 99.95                | 771702.1 | C20 H27 O6  |

Figure S3. HRESIMS spectrum of 16 $\alpha$ -hydroxy ingenol (**M2**)

XSJ-JDJC-3 <sup>1</sup>H NMR (500MHz, CD<sub>3</sub>OD)

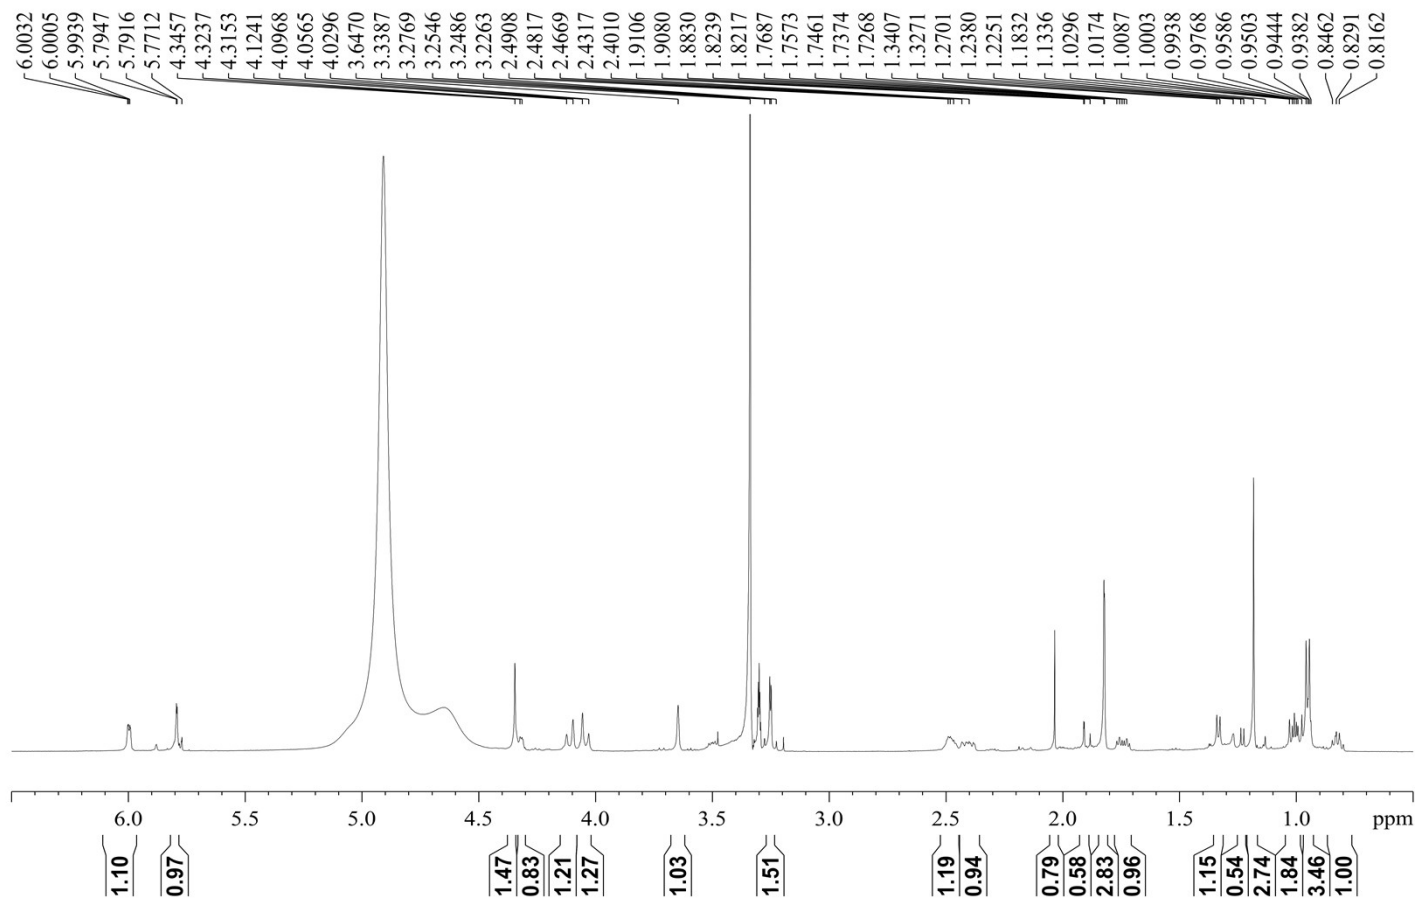

Figure S4. <sup>1</sup>H-NMR spectrum of 16 $\alpha$ -hydroxy ingenol (M2) in methanol-d<sub>4</sub>

XSJ-JDJC-3 C13 and DEPT NMR (125 MHz, CD3OD)

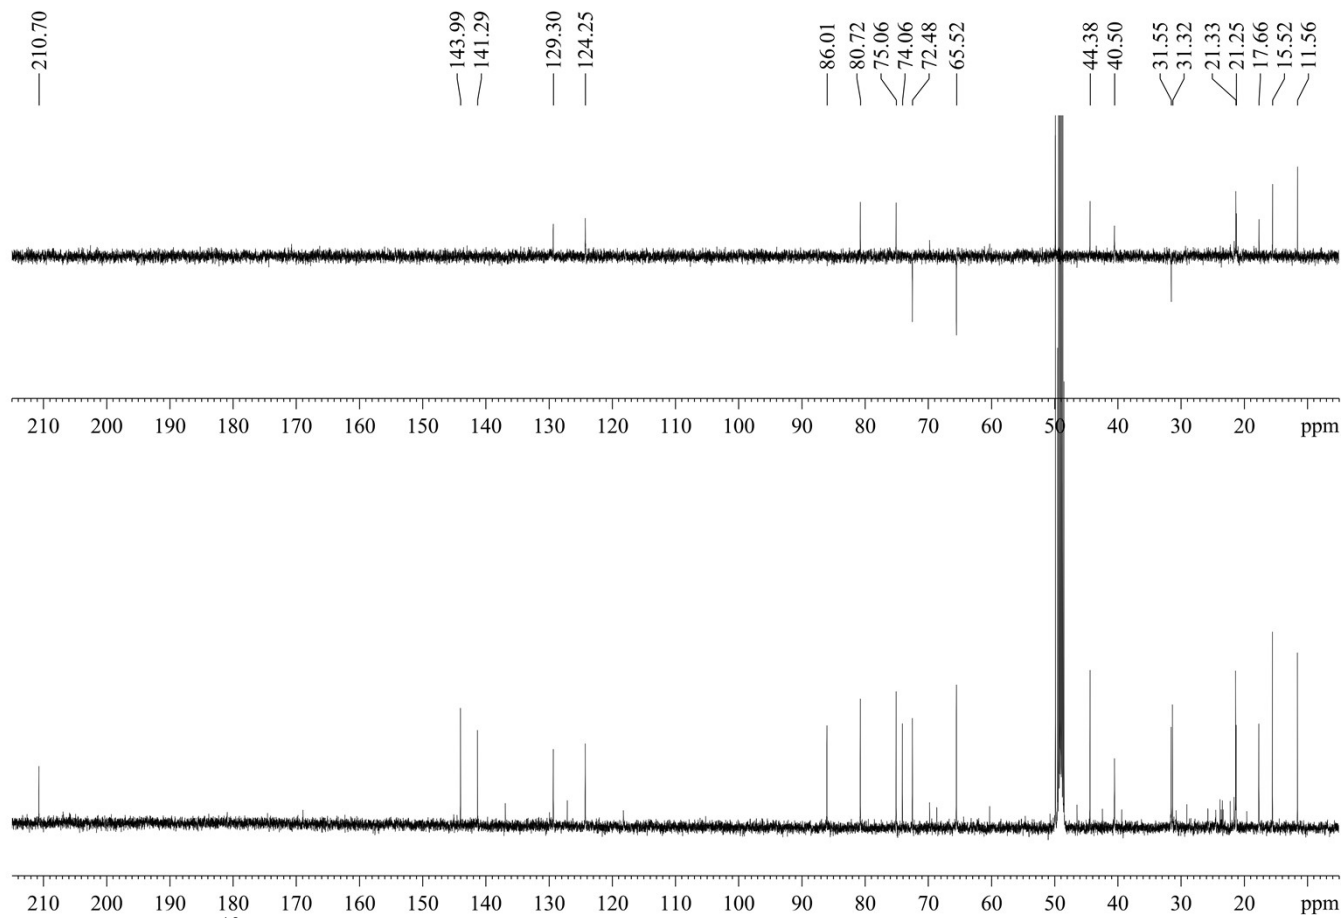

Figure S5.  $^{13}\text{C}$  and DEPT-135 NMR spectrum of  $16\alpha$ -hydroxy ingenol (**M2**) in methanol- $d_4$

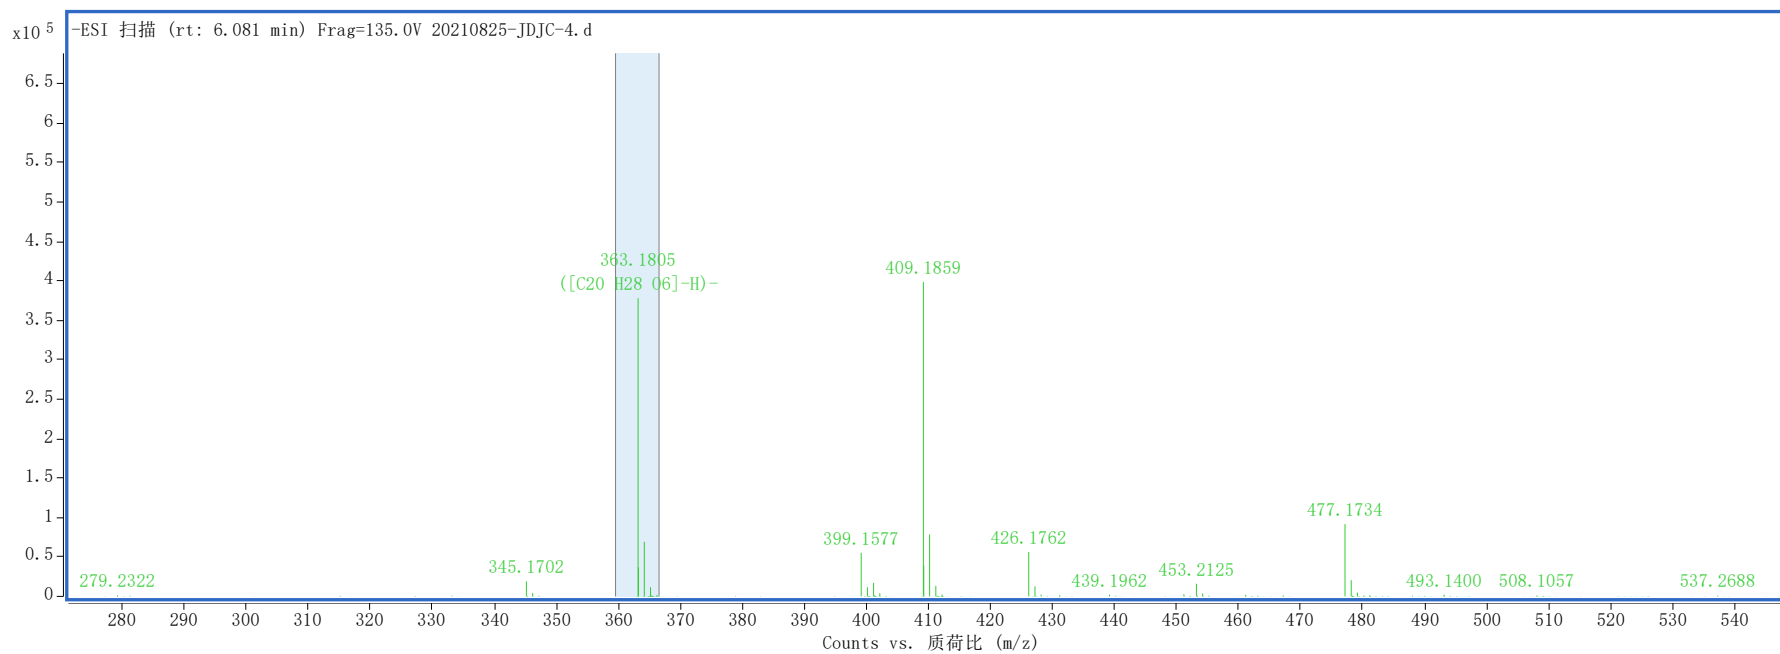

| Height (Calc) | Height Sum% (Calc) | Height % (Calc) | m/z (Calc) | Diff (mDa) | Height   | Height % | Height Sum % | m/z      |
|---------------|--------------------|-----------------|------------|------------|----------|----------|--------------|----------|
| 364762        | 79.5               | 100             | 363.1813   | 0.8        | 377952.3 | 100      | 82.4         | 363.1805 |

| Species | m/z      | Score (iso. abund) | Score (mass) | Score (MS) | Score (MFG) | Score (iso. spacing) | Height   | Ion Formula                                    |
|---------|----------|--------------------|--------------|------------|-------------|----------------------|----------|------------------------------------------------|
| (M-H)-  | 363.1805 | 89.15              | 96.87        | 95.17      | 95.17       | 99                   | 377952.3 | C <sub>20</sub> H <sub>27</sub> O <sub>6</sub> |

Figure S6. HRESIMS spectrum of 17 $\beta$ -hydroxy ingenol (**M3**)

## Rudolph Research Analytical

Monday, 07/05/2021

This sample was measured on an Autopol VI, serial number 90079,  
manufactured by Rudolph Research Analytical, Hackettstown, NJ.

LotID : JDJC-4  
Set Temperature : 20.0  
Temp Corr : OFF

|          |                |                 |                |                |
|----------|----------------|-----------------|----------------|----------------|
| <b>n</b> | <b>Average</b> | <b>Std.Dev.</b> | <b>Maximum</b> | <b>Minimum</b> |
| 6        | -8.933         | 0.1886          | -8.800         | -9.200         |

| <b>S.No</b> | <b>Sample ID</b> | <b>Time</b> | <b>Result</b> | <b>Scale</b> | <b>OR ° Arc</b> | <b>WLG</b> | <b>Lg.mm</b> | <b>Conc.</b> | <b>Temp.</b> | <b>Comment</b> |
|-------------|------------------|-------------|---------------|--------------|-----------------|------------|--------------|--------------|--------------|----------------|
| 1           | JDJC-4           | 02:59:01 PM | -8.800        | SR           | -0.022          | 589        | 100.00       | 0.250        | 19.7         |                |
| 2           | JDJC-4           | 02:59:08 PM | -9.200        | SR           | -0.023          | 589        | 100.00       | 0.250        | 19.7         |                |
| 3           | JDJC-4           | 02:59:15 PM | -9.200        | SR           | -0.023          | 589        | 100.00       | 0.250        | 19.7         |                |
| 4           | JDJC-4           | 02:59:22 PM | -8.800        | SR           | -0.022          | 589        | 100.00       | 0.250        | 19.7         |                |
| 5           | JDJC-4           | 02:59:30 PM | -8.800        | SR           | -0.022          | 589        | 100.00       | 0.250        | 19.7         |                |
| 6           | JDJC-4           | 02:59:37 PM | -8.800        | SR           | -0.022          | 589        | 100.00       | 0.250        | 19.8         |                |

\_\_\_\_\_  
Signature

Figure S7. OR Value of 17 $\beta$ -hydroxy ingenol (**M3**) in CH<sub>3</sub>OH



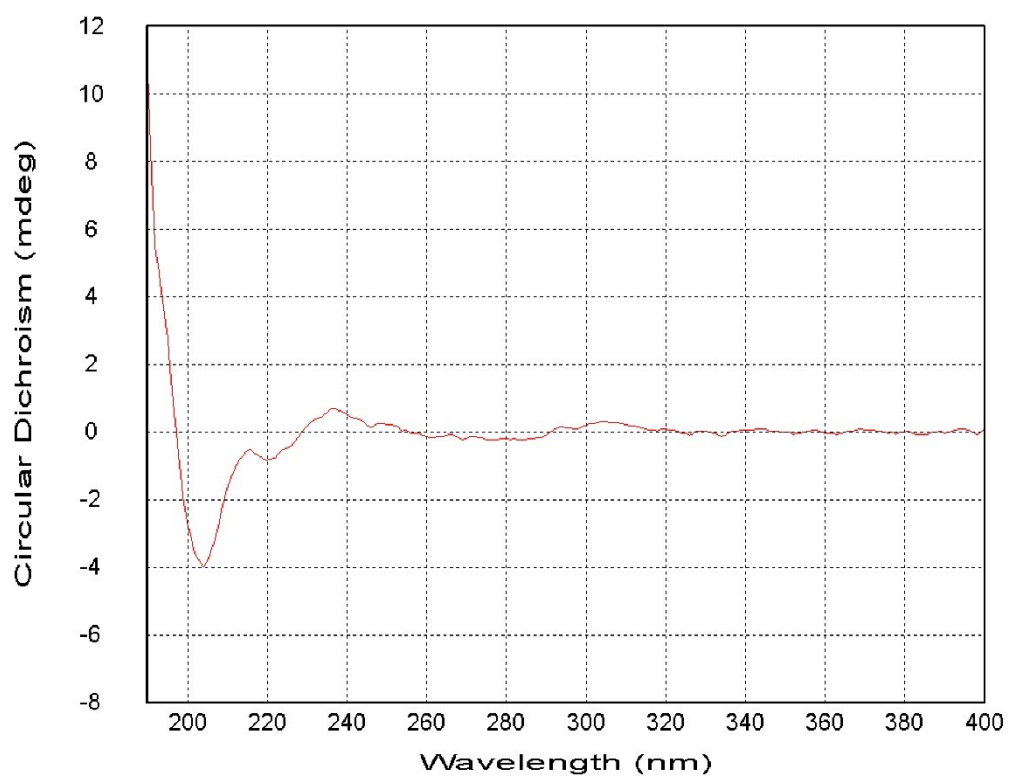

Figure S8. CD Value of 17β-hydroxy ingenol (**M3**) in CH<sub>3</sub>OH

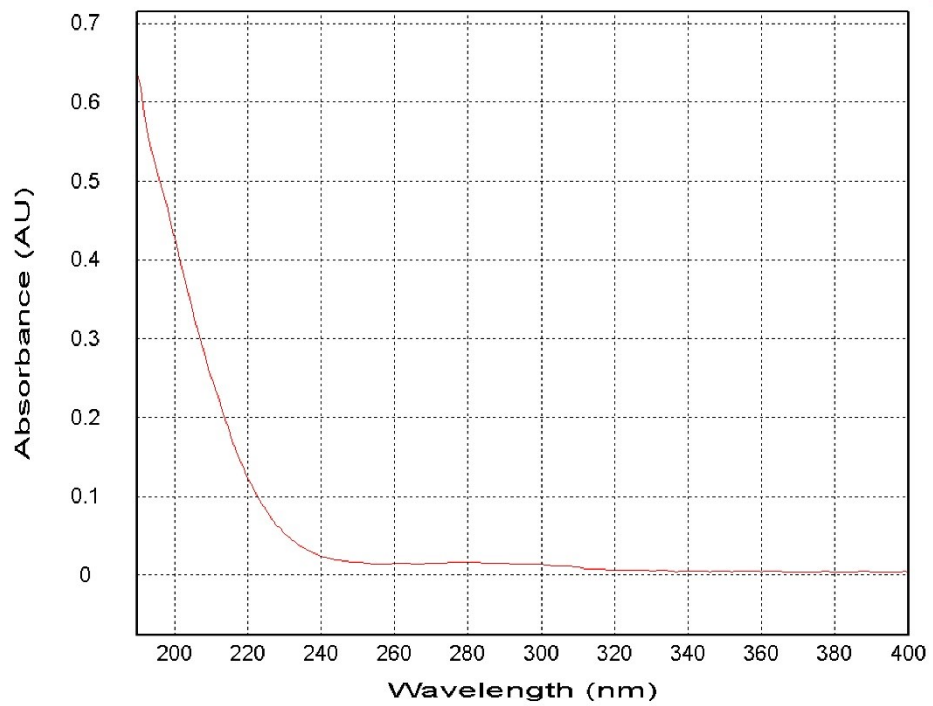

Figure S9. UV spectrum of 17β-hydroxy ingenol (**M3**) in CH<sub>3</sub>OH

XSJ-JDJC-4 <sup>1</sup>H NMR (500 MHz, CD3OD)

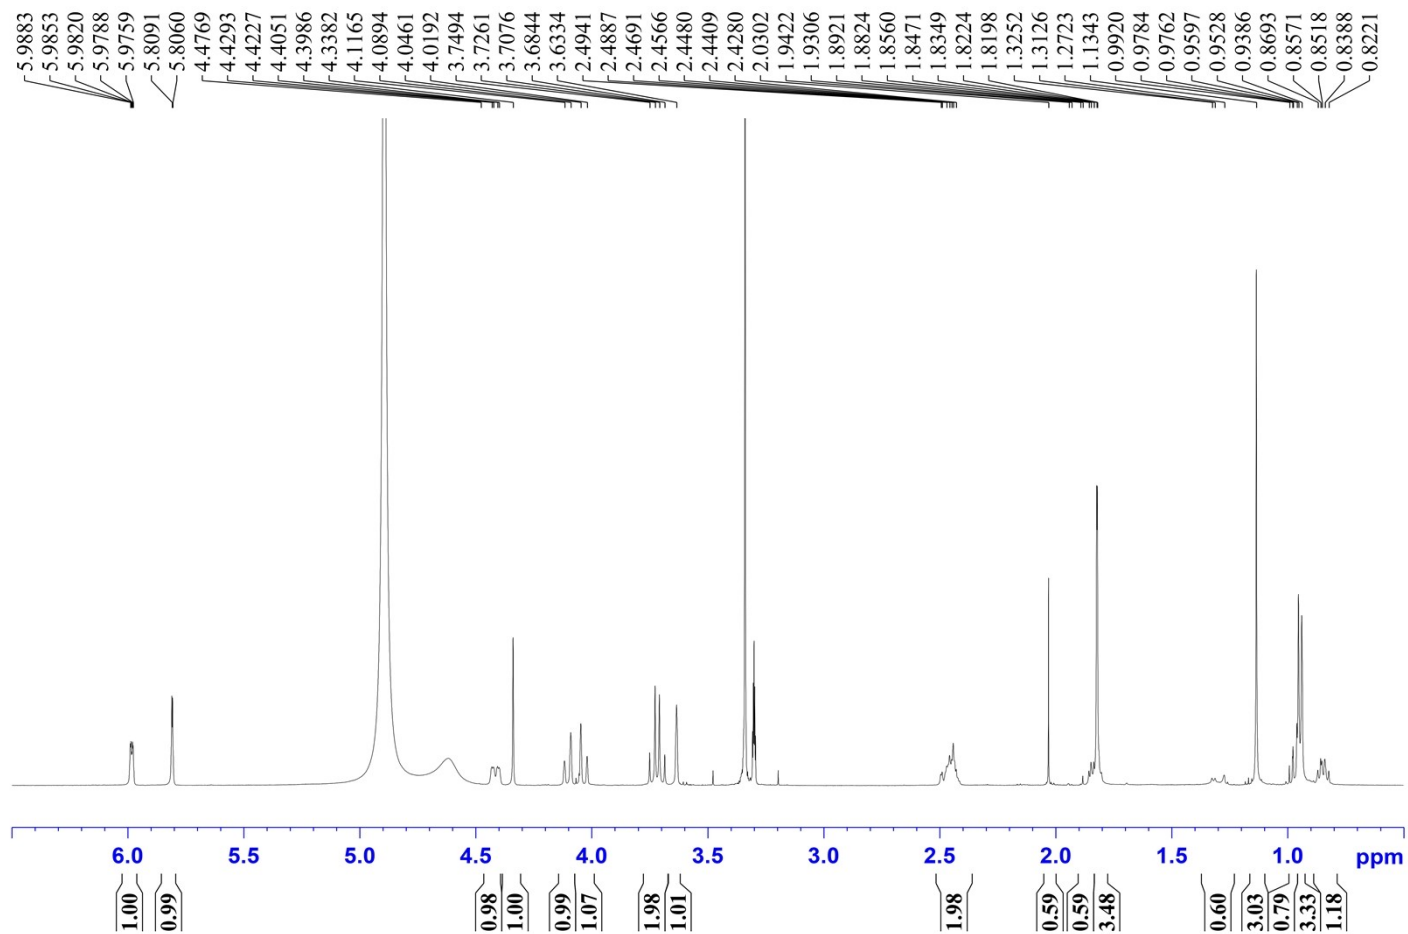

Figure S10. <sup>1</sup>H-NMR spectrum of 17 $\beta$ -hydroxy ingenol (**M3**) in methanol-d<sub>4</sub>

XSJ-JDJC-4 C13 NMR (125 MHz, CD3OD)

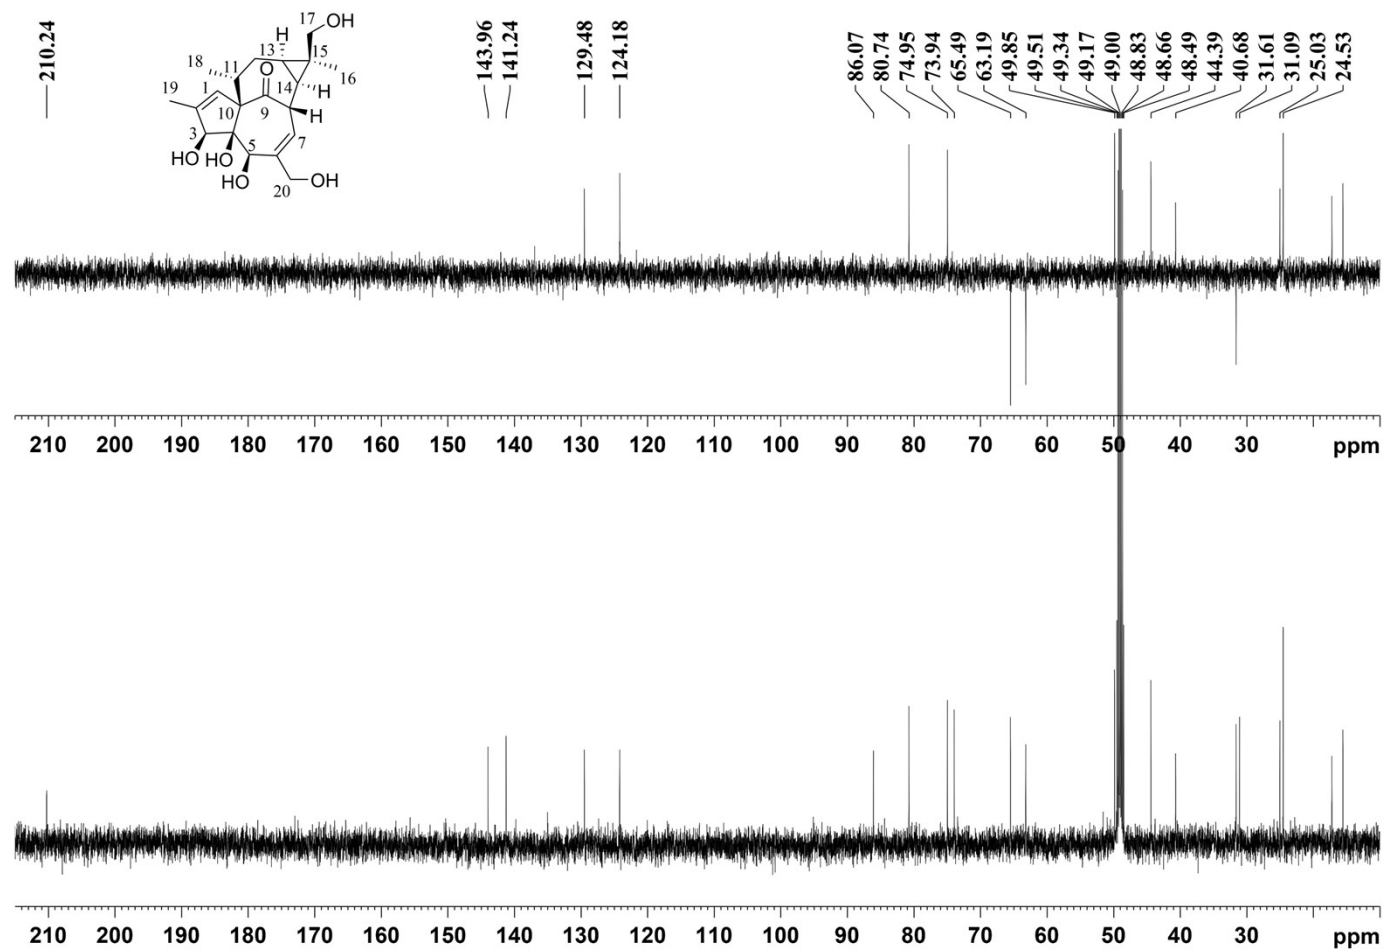

Figure S11. <sup>13</sup>C and DEPT-135 NMR spectrum of 17β-hydroxy ingenol (M3) in Methanol-d4

XSJ-JDJC-4 1H 1H COSY

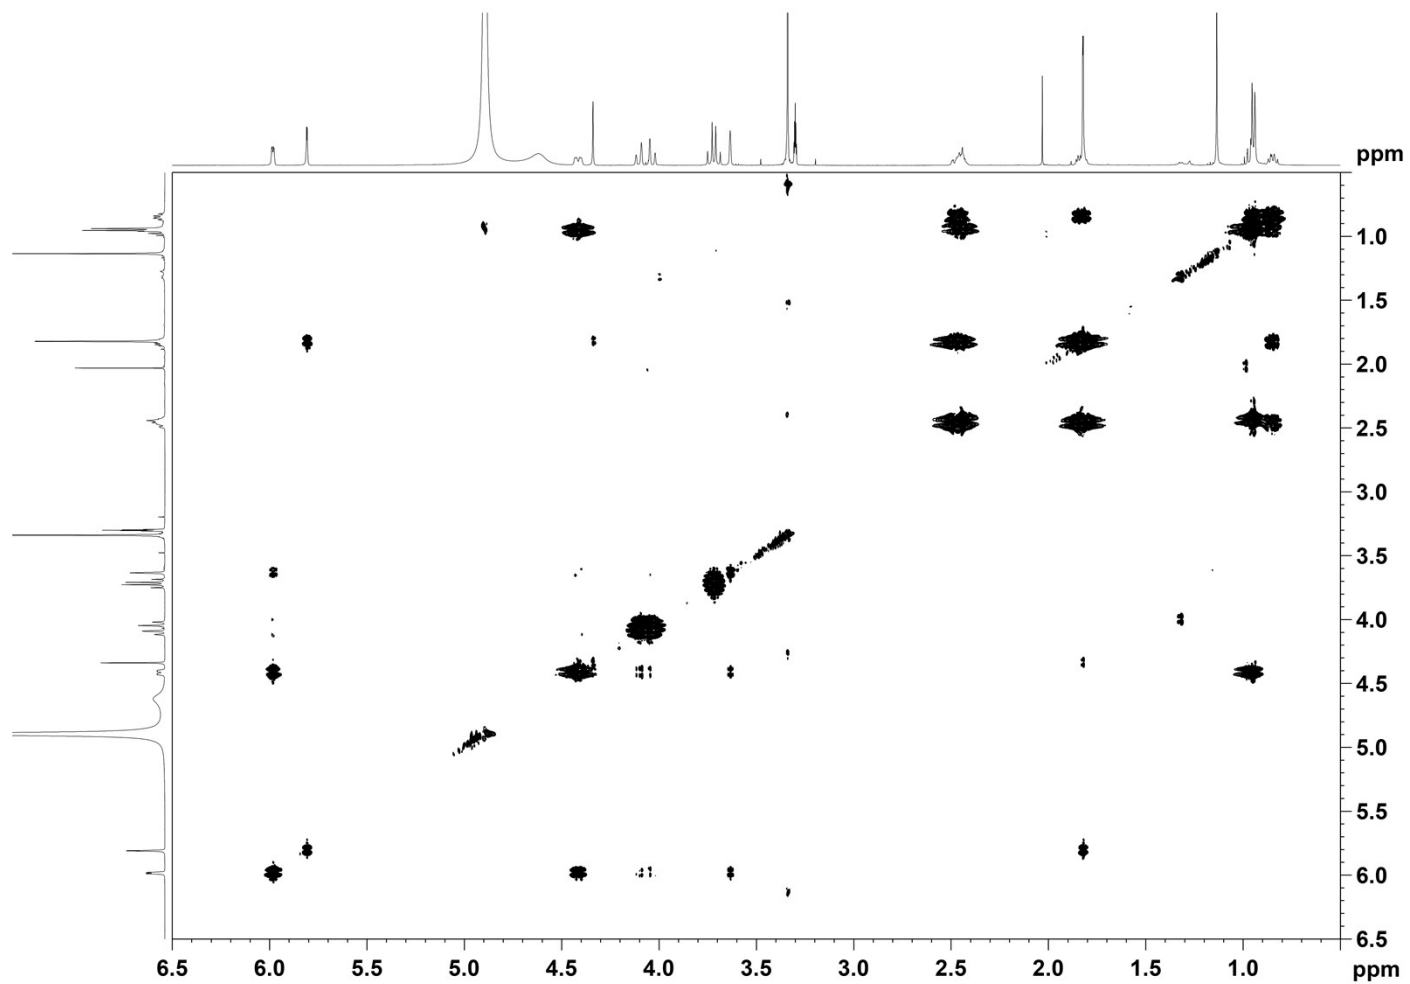

Figure S12.  $^1\text{H}$ - $^1\text{H}$  COSY spectrum of 17 $\beta$ -hydroxy ingenol (**M3**) in methanol- $d_4$

XSJ-JDJC-4 HSQC

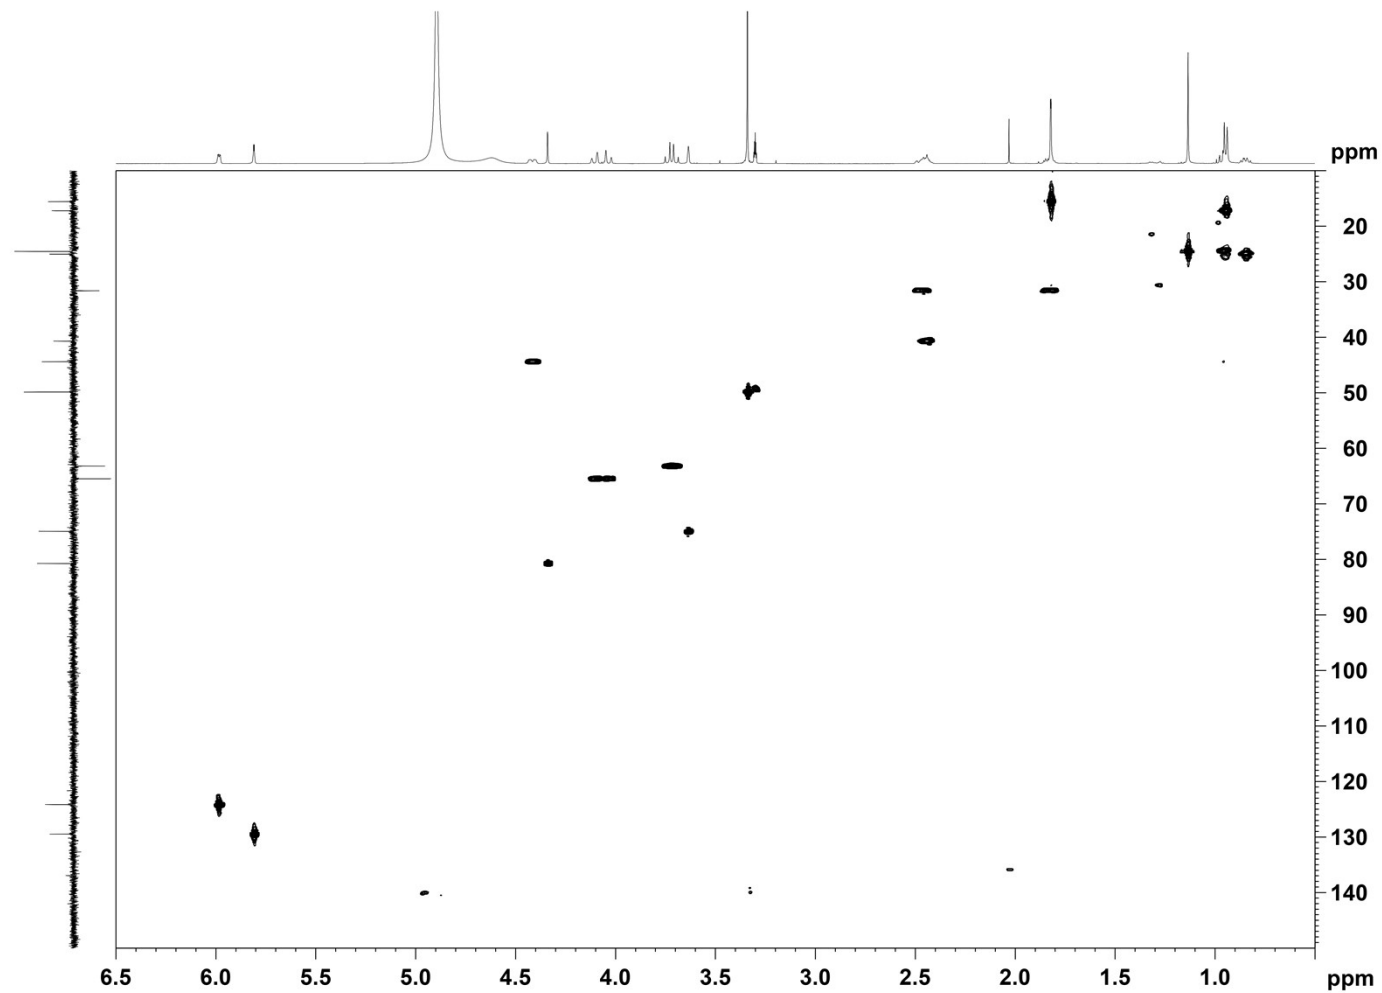

Figure S13. HSQC spectrum of 17 $\beta$ -hydroxy ingenol (**M3**) in methanol-d<sub>4</sub>



XSJ-JDJC-4 HMBC

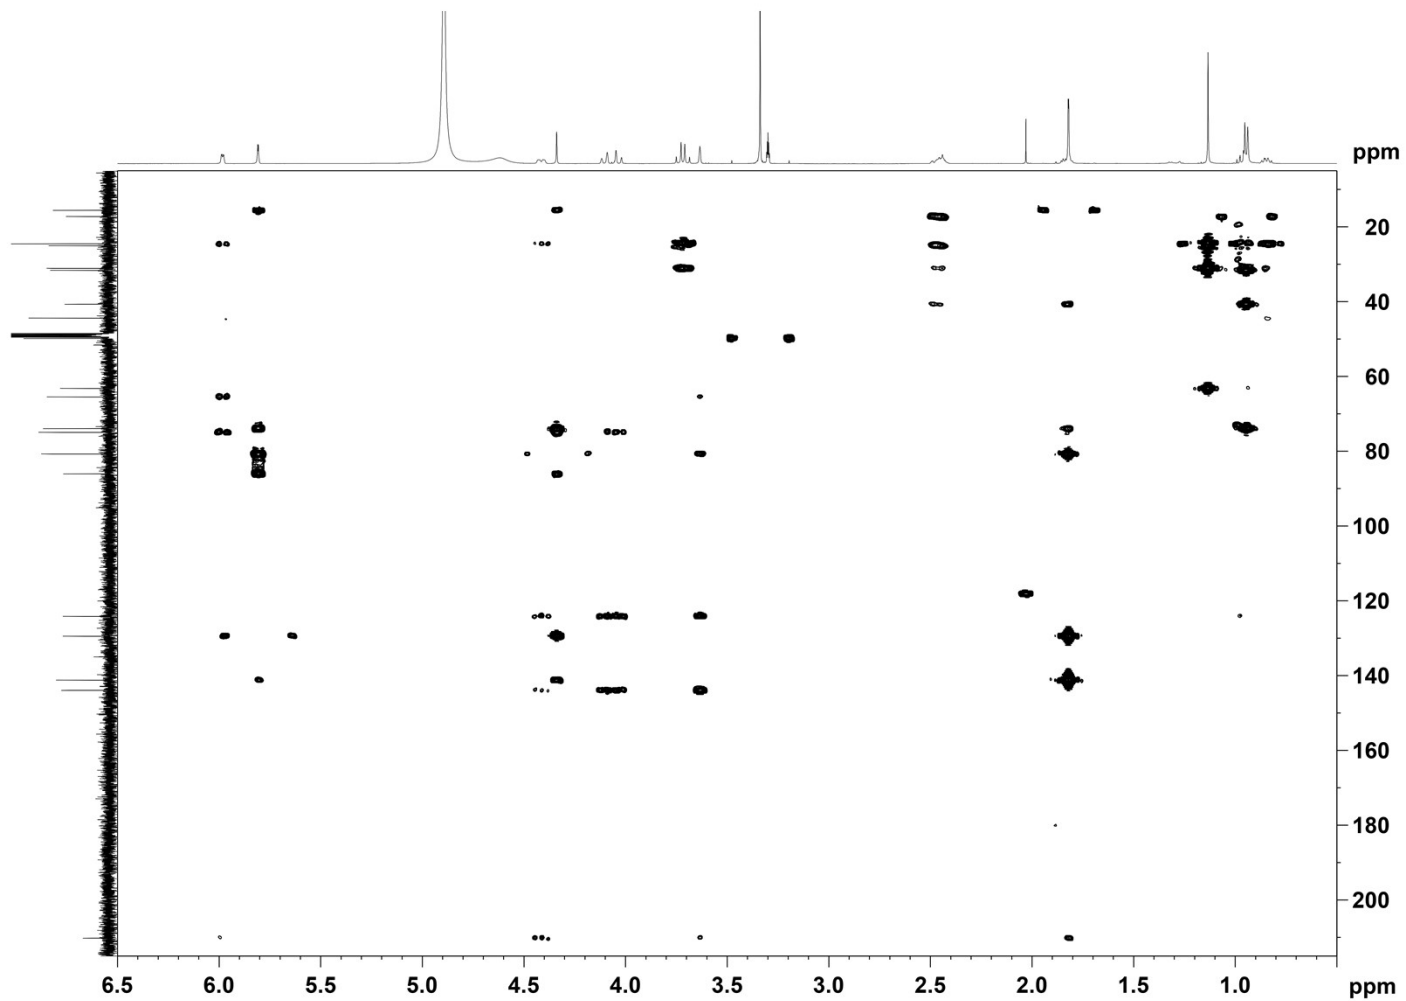

Figure S14. HMBC spectrum of 17 $\beta$ -hydroxy ingenol (**M3**) in methanol-d<sub>4</sub>

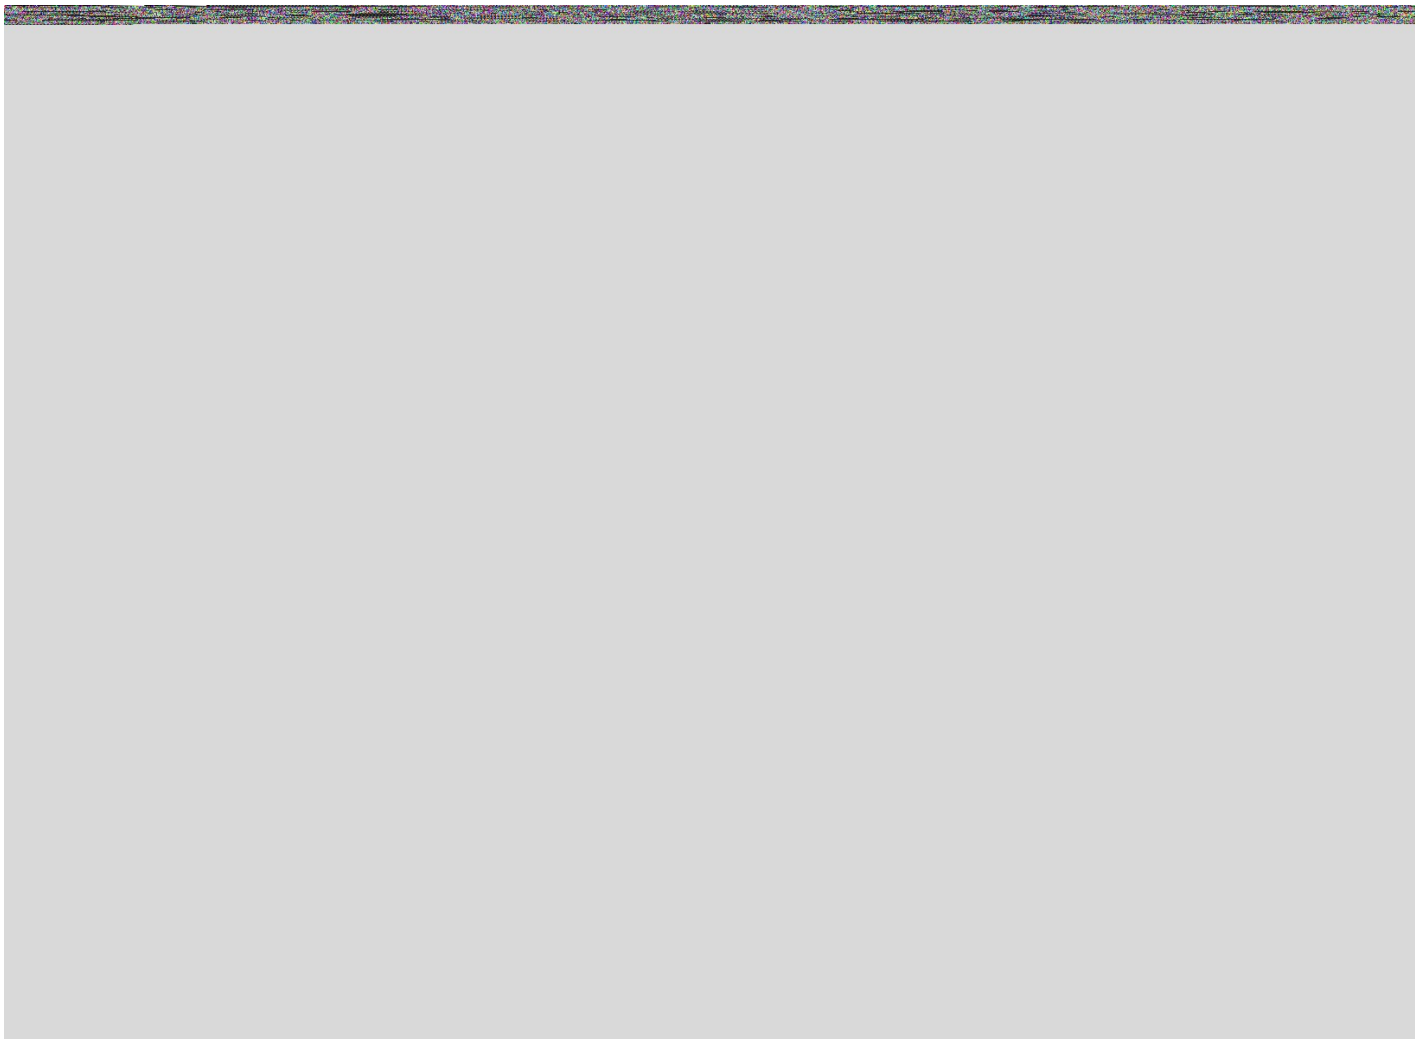

Figure S15. NOESY spectrum of 17 $\beta$ -hydroxy ingenol (**M3**) in methanol-d4

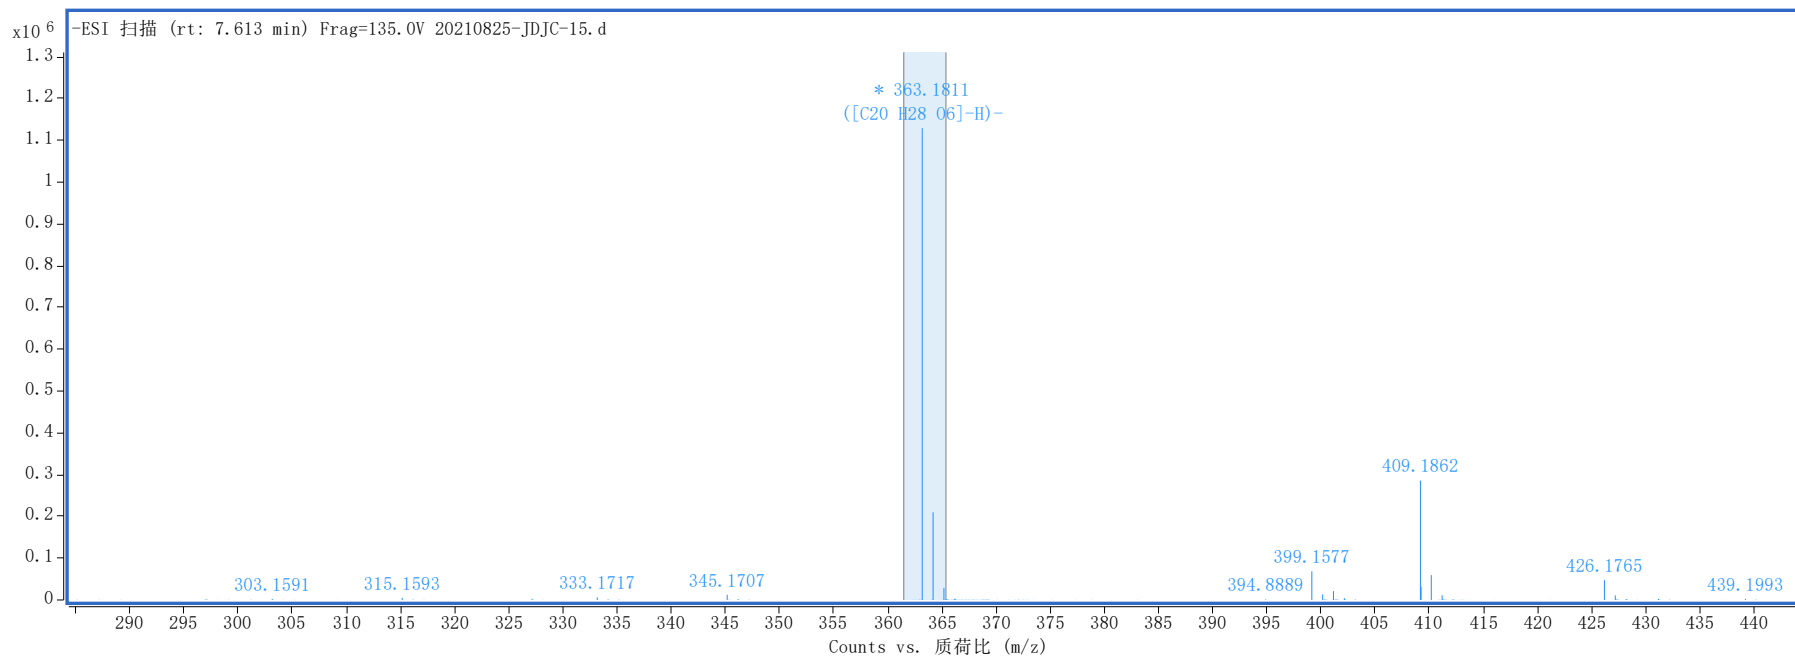

| Height (Calc) | Height Sum% (Calc) | Height % (Calc) | m/z (Calc) | Diff (mDa) | Height    | Height % | Height Sum % | m/z      |
|---------------|--------------------|-----------------|------------|------------|-----------|----------|--------------|----------|
| 1087811.5     | 79.5               | 100             | 363.1813   | 0.2        | 1128967.4 | 100      | 82.5         | 363.1811 |

| Species | m/z      | Score (iso. abund) | Score (mass) | Score (MS) | Score (MFG) | Score (iso. spacing) | Height    | Ion Formula |
|---------|----------|--------------------|--------------|------------|-------------|----------------------|-----------|-------------|
| (M-H)-  | 363.1811 | 90.56              | 99.74        | 97.14      | 97.14       | 99.85                | 1128967.4 | C20 H27 O6  |

Figure S16. HRESIMS spectrum of 19-hydroxy ingenol (**M4**)

## Rudolph Research Analytical

Monday, 07/05/2021

This sample was measured on an Autopol VI, serial number 90079,  
manufactured by Rudolph Research Analytical, Hackettstown, NJ.

LotID : JDJC-15

Set Temperature : 20.0

Temp Corr : OFF

| n | Average | Std.Dev. | Maximum | Minimum |
|---|---------|----------|---------|---------|
| 6 | -18.500 | 0.5000   | -18.000 | -19.000 |

| S.No | Sample ID | Time        | Result  | Scale | OR ° Arc | WLG | Lg.mm  | Conc. | Temp. | Comment |
|------|-----------|-------------|---------|-------|----------|-----|--------|-------|-------|---------|
| 1    | JDJC-15   | 03:36:44 PM | -18.000 | SR    | -0.018   | 589 | 100.00 | 0.100 | 19.8  |         |
| 2    | JDJC-15   | 03:36:52 PM | -19.000 | SR    | -0.019   | 589 | 100.00 | 0.100 | 19.8  |         |
| 3    | JDJC-15   | 03:36:59 PM | -19.000 | SR    | -0.019   | 589 | 100.00 | 0.100 | 19.8  |         |
| 4    | JDJC-15   | 03:37:06 PM | -19.000 | SR    | -0.019   | 589 | 100.00 | 0.100 | 19.8  |         |
| 5    | JDJC-15   | 03:37:13 PM | -18.000 | SR    | -0.018   | 589 | 100.00 | 0.100 | 19.8  |         |
| 6    | JDJC-15   | 03:37:20 PM | -18.000 | SR    | -0.018   | 589 | 100.00 | 0.100 | 19.8  |         |

---

Signature

Figure S17. OR Value of 19-hydroxy ingenol (**M4**) in CH<sub>3</sub>OH

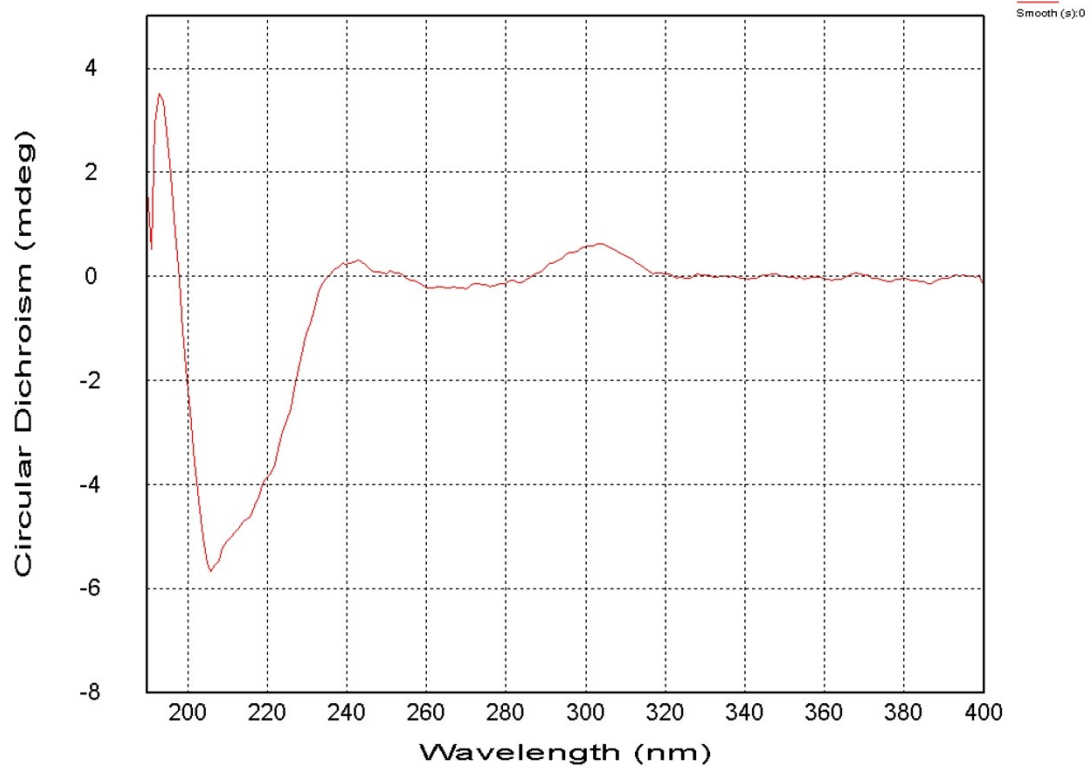

Figure S18. CD Value of 19-hydroxy ingenol (**M4**) in CH<sub>3</sub>OH

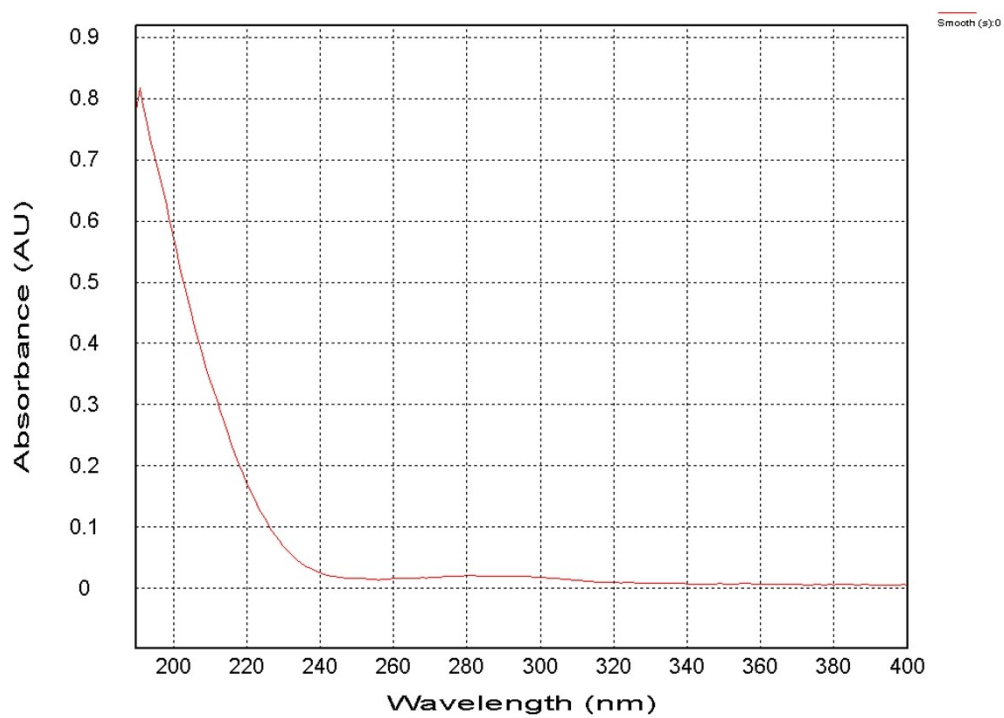

Figure S19. UV spectrum of 19-hydroxy ingenol (**M4**) in CH<sub>3</sub>OH

XSJ-JDJC-15 1H NMR (500 MHz, CD3OD)

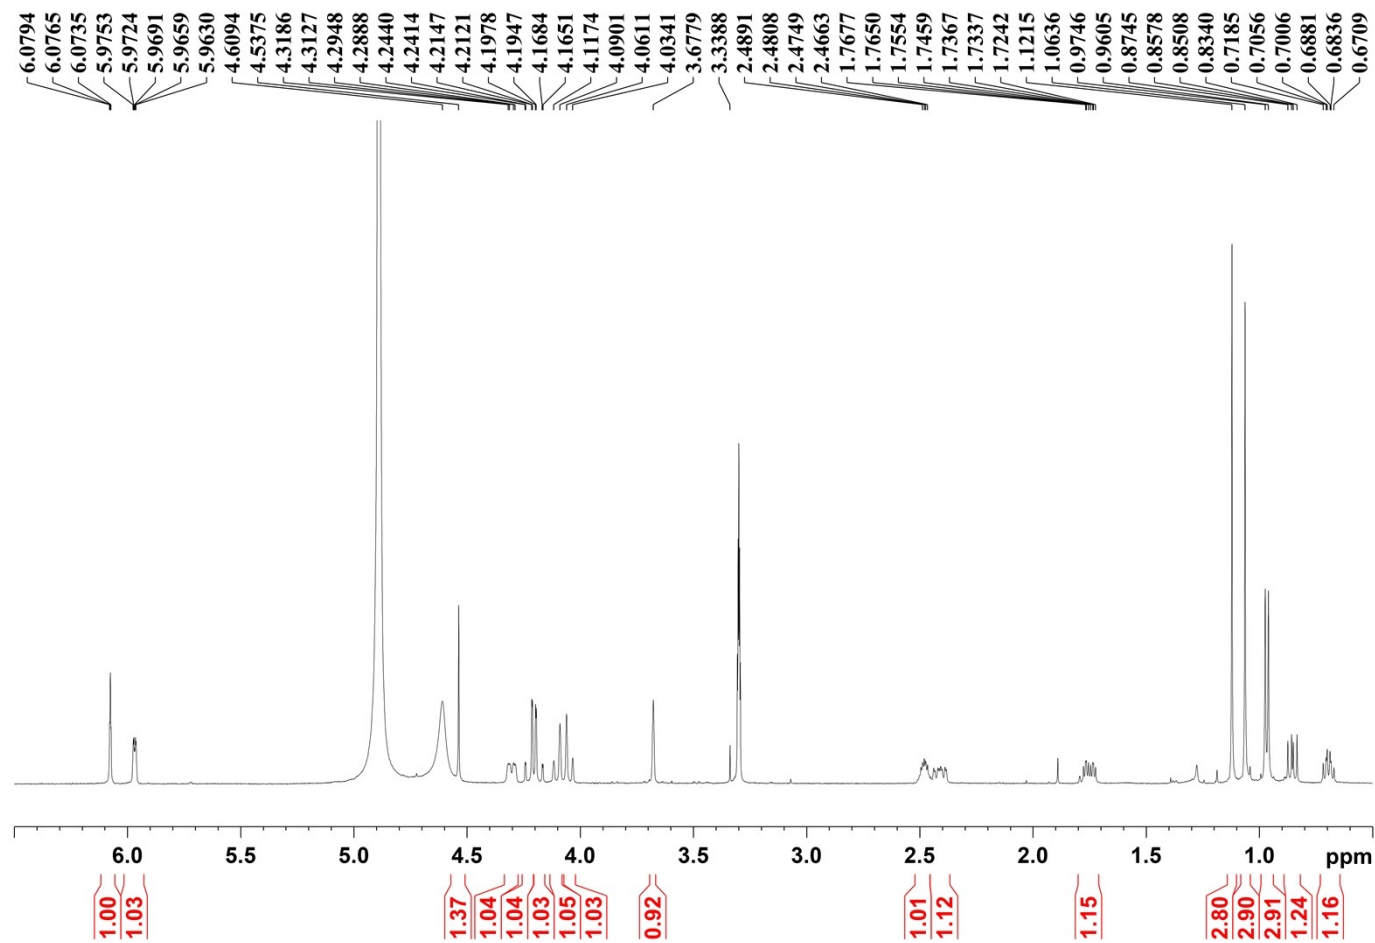

Figure S20. 1H NMR spectrum of 19-hydroxy ingenol (M4) in methanol-d4

<sup>13</sup>C and DEPT NMR for JDJC-15 (125 MHz, CD<sub>3</sub>OD)

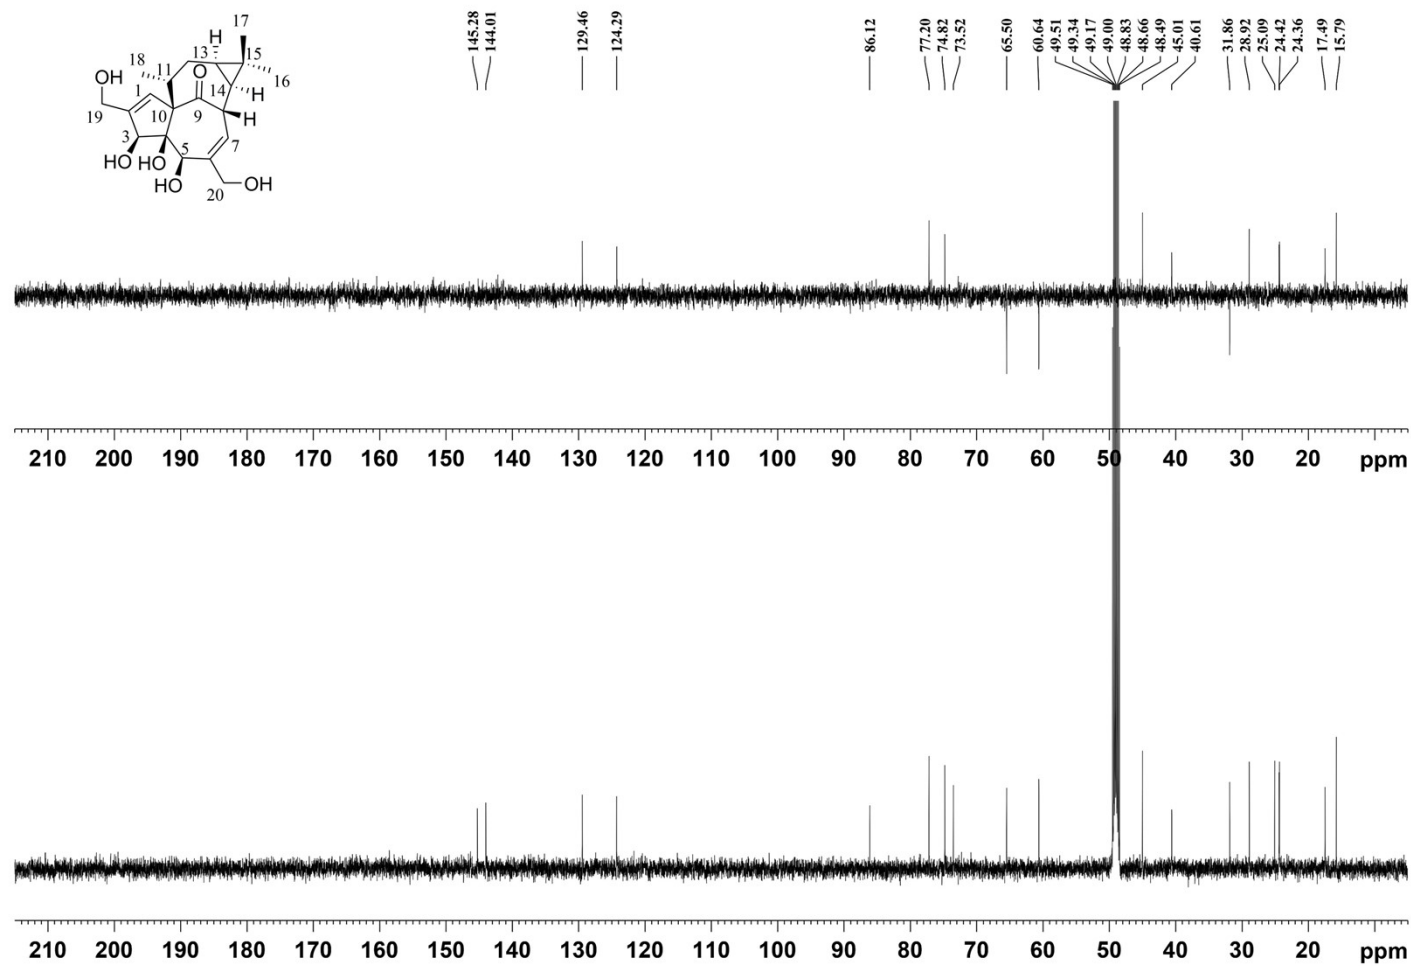

Figure S21. <sup>13</sup>C NMR and DEPT-135 spectrum of 19-hydroxy ingenol (M4) in methanol-d<sub>4</sub>



XSJ-JDJC-15 1H 1H COSY

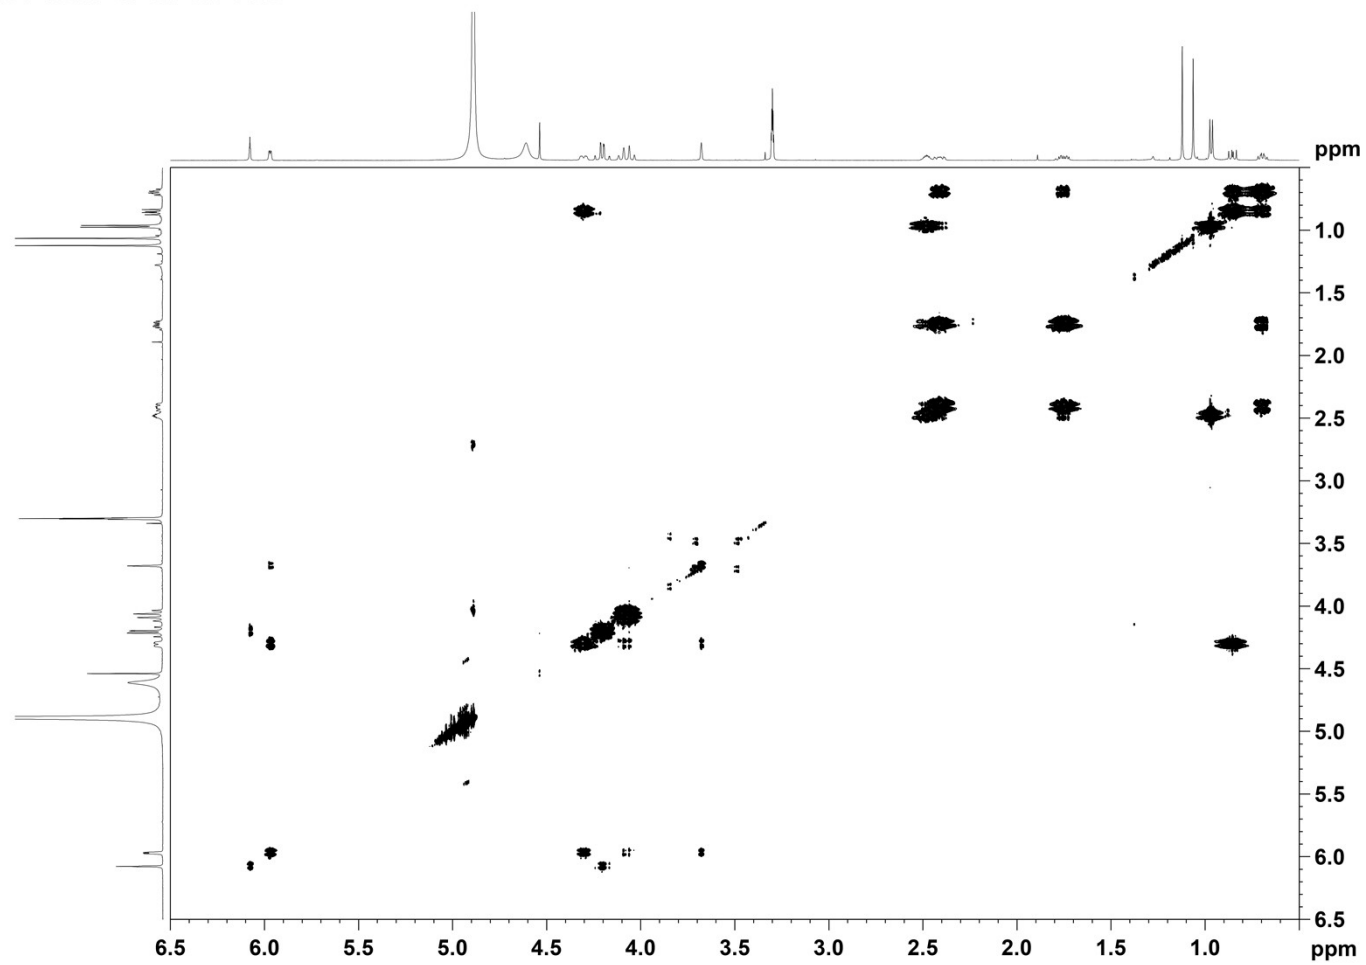

Figure S22.  $^1\text{H}$ - $^1\text{H}$  COSY spectrum of 19-hydroxy ingenol (M4) in methanol- $d_4$

XSJ-JDJC-15 HSQC

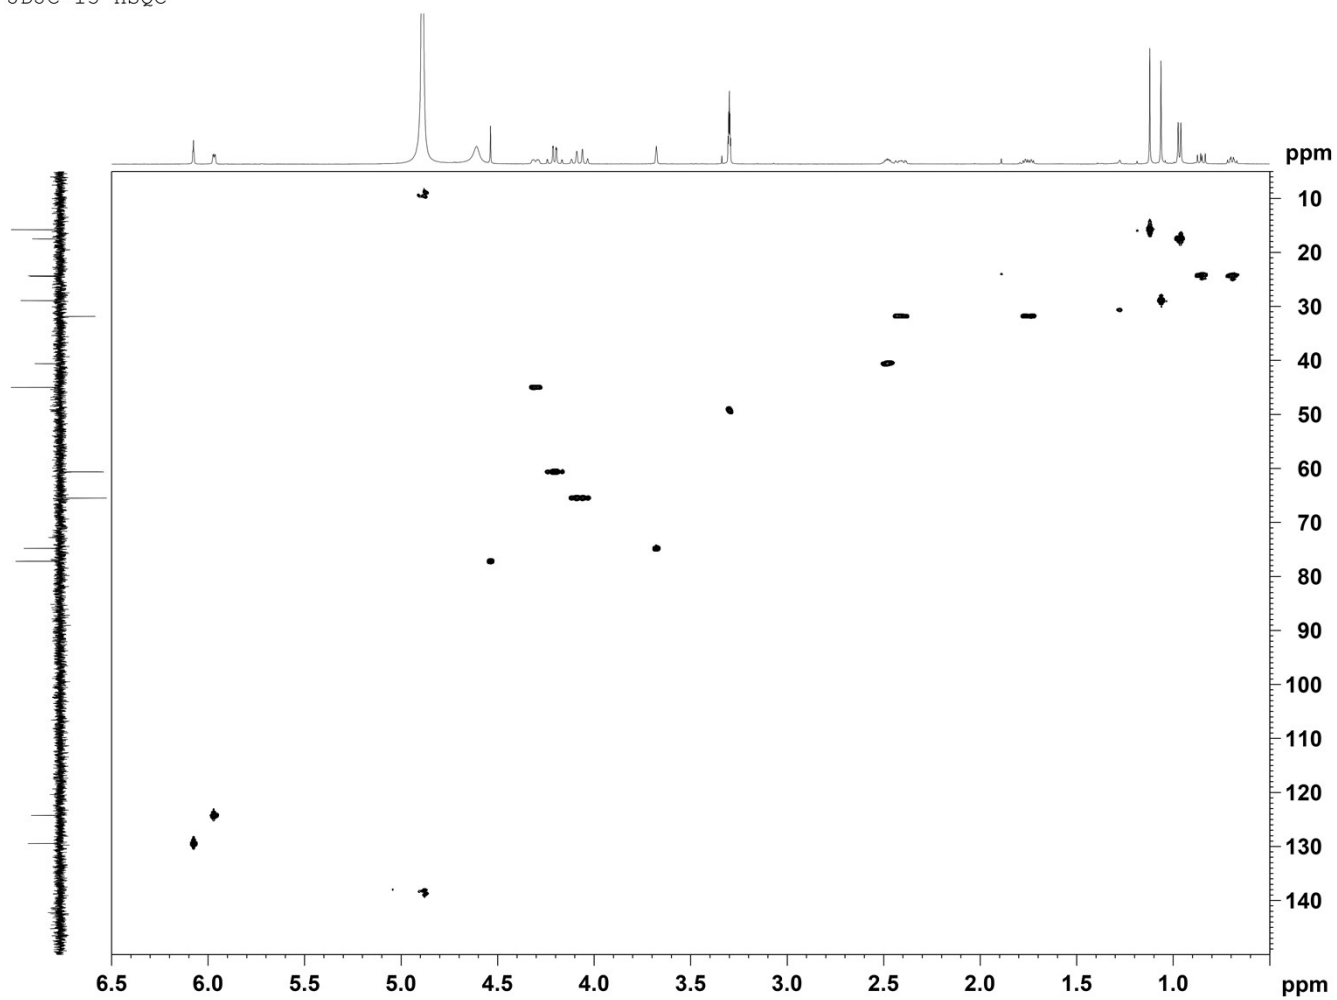

Figure S23. HSQC spectrum of 19-hydroxy ingenol (**M4**) in methanol- $d_4$

XSJ-JDJC-15 HMBC

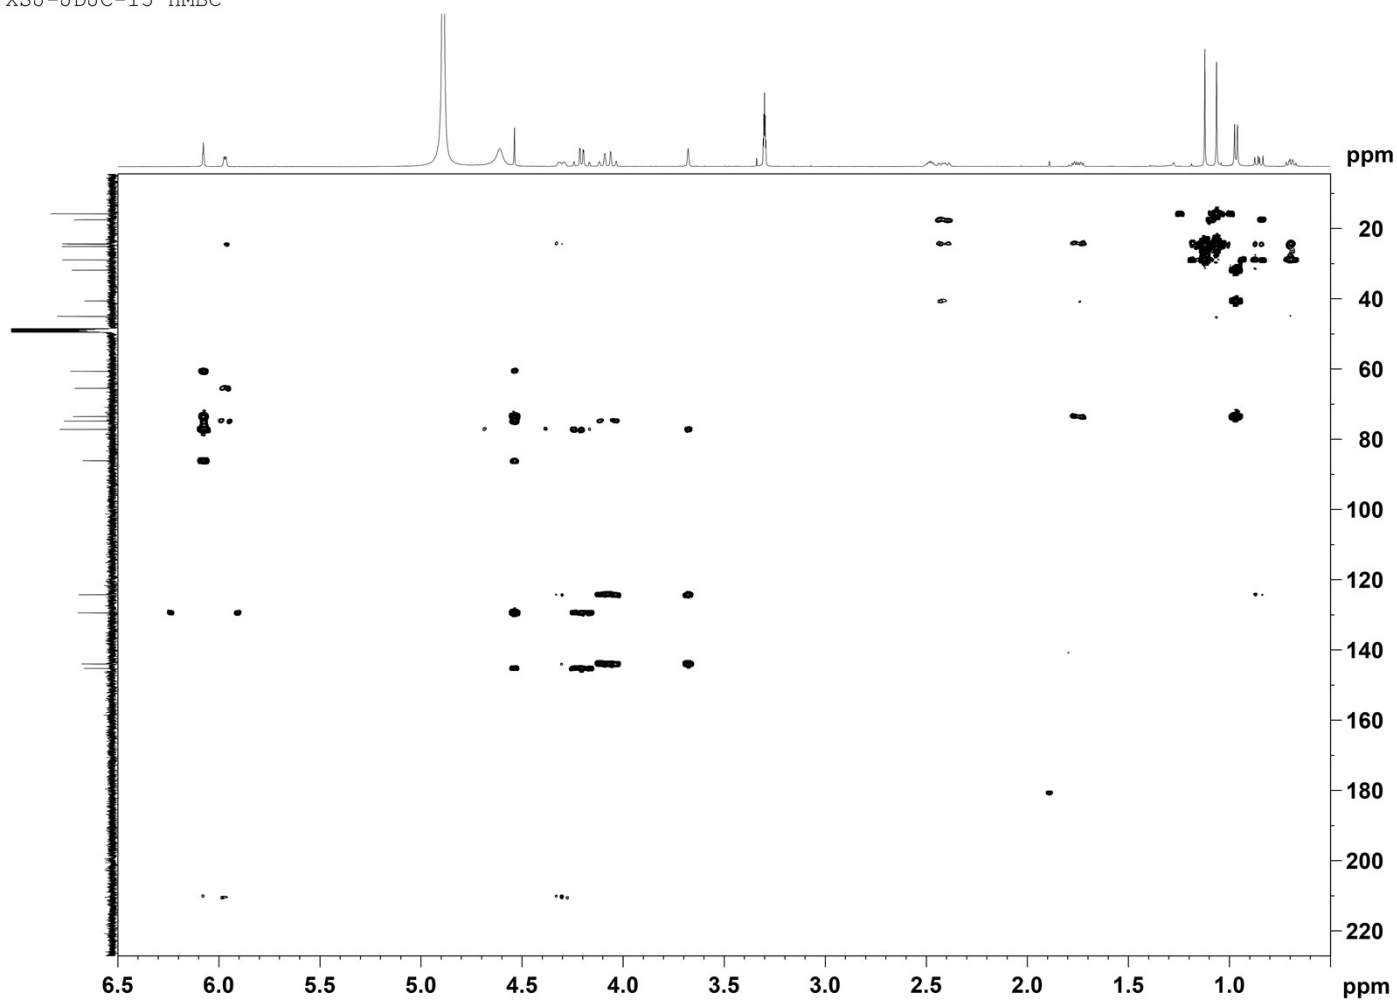

Figure S24. HMBC spectrum of 19-hydroxy ingenol (M4) in methanol-d4

XSJ-JDJC-15 NOESY

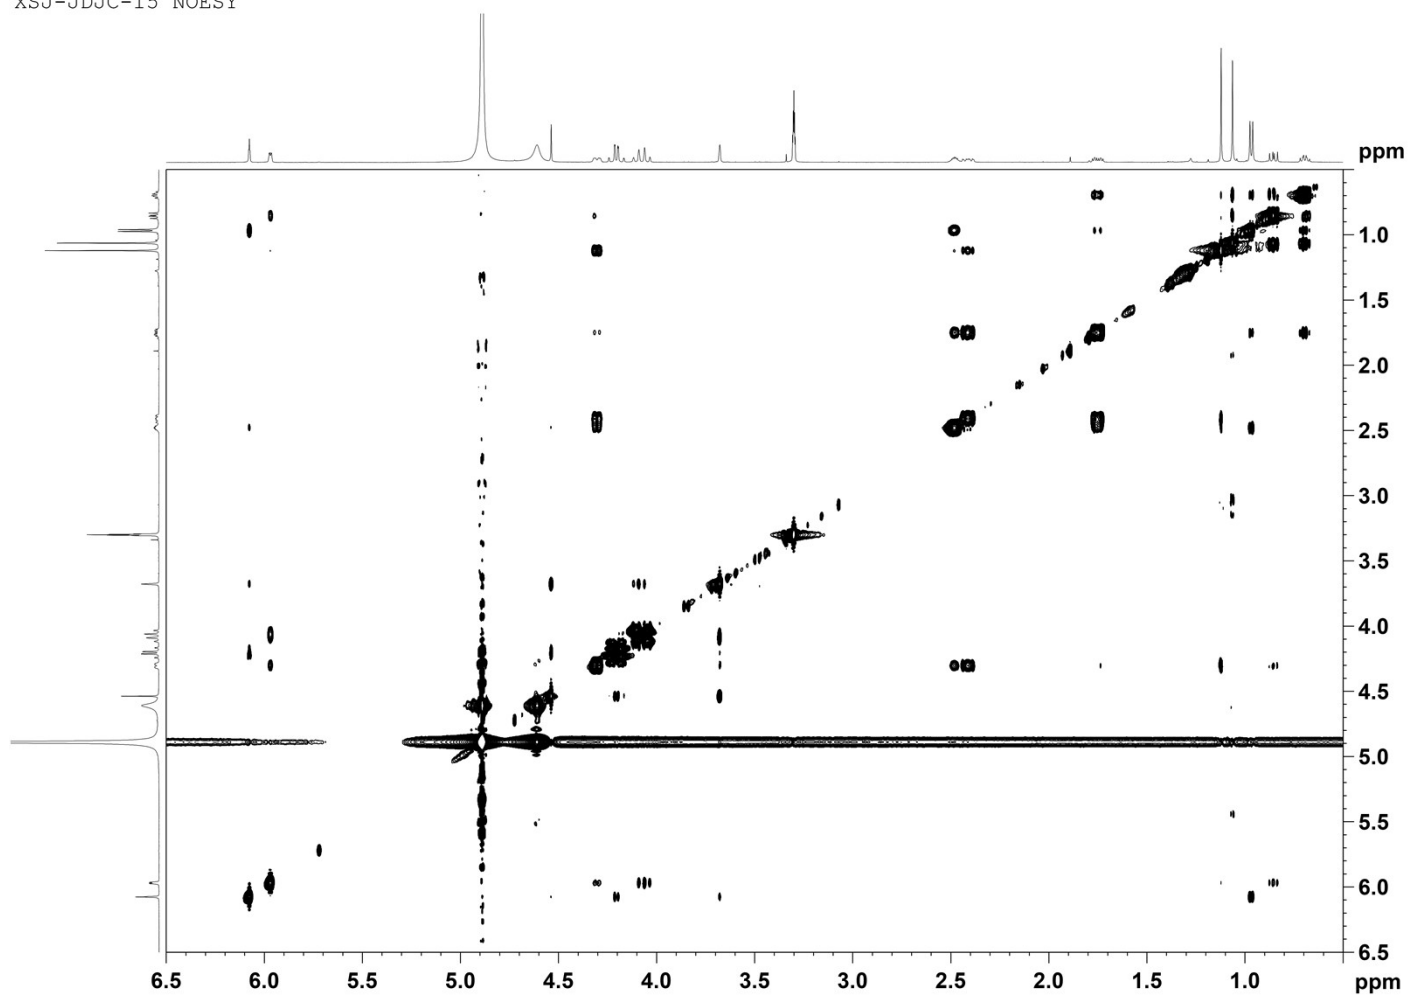

Figure S25. NOESY spectrum of 19-hydroxy ingenol (M4) in methanol-d4
